# Supplementary material
Source: MDPI journal article supplement (https://www.mdpi.com/2227-9717/10/2/208)
Supplement: s1 [file s1]

**Table S1.** Compounds identified in pomegranate dry extract (PunicaPLUS®) according to their retention time, area of chromatographic peak (arbitrarial unit) and area percentage (%)

| Peak number | Identified compound           | Retention |         |         |
|-------------|-------------------------------|-----------|---------|---------|
|             |                               | Time      | Area    | Area%   |
| 1           | HHDP-hexose                   | 1.25      | 188186  | 1.2095  |
| 2           | Citric acid                   | 1.51      | 157164  | 1.0101  |
| 3           | Galloyl-hexoside              | 1.60      | 7521    | 0.4630  |
| 4           | Gallic acid                   | 1.74      | 7125    | 0.4580  |
| 5           | Galloyl-hexoside              | 2.60      | 1097721 | 7.0553  |
| 6           | Punicalin $\beta$             | 2.85      | 391700  | 2.5175  |
| 7           | HHDP galloyl glucose          | 3.30      | 578131  | 3.7158  |
| 8           | Citric acid derivative        | 3.67      | 34063   | 0.2189  |
| 9           | Pedunculagin (di-HHDP-hexose) | 4.03      | 139688  | 0.8978  |
| 10          | Punicalagin                   | 4.29      | 637523  | 4.0975  |
| 11          | Galloyl-HHDP-gluconate        | 4.76      | 484202  | 3.1121  |
| 12          | Punicalagin*                  | 6.35      | 2456116 | 15.7860 |
| 13          | Punicalagin*                  | 10.08     | 7179960 | 46.1472 |
| 14          | HHDP galloyl glucose          | 14.49     | 140426  | 0.90250 |
| 15          | Pedunculagin (di-HHDP-hexose) | 15.54     | 380000  | 2.44230 |
| 16          | Ellagic acid-hexoside         | 18.73     | 313079  | 2.01220 |
| 17          | Ellagic acid                  | 23.00     | 945092  | 6.07430 |
| 18          | Ellagic acid-pentoside        | 23.81     | 121485  | 0.78080 |
| 19          | Kaempferol hexoside           | 24.26     | 168699  | 1.08430 |
